# Supplementary material for: A Forensic-Pragmatic Study of Judicial Questioning Patterns: Interrogation Techniques and Semantic Negotiation in Saudi Courtrooms
Source: Research Square preprint supplement (doi:10.21203/rs.3.rs-7124256/v1), 2025-10-09
Supplement: Supplementary file 1 [file a19b415d2f1dfb05733ba9c5.docx]

**A translation and summary of the provided file, "Volume 13 of the “Majmūʿat al-Aḥkām al-Qaḍāʾiyya.pdf," A Collection of Judicial Judgements – Volume 13**

**Translation and Summary of the Source Document**

**1. Summary of the Document**

The document provided is **Volume 13 of the *Majmūʿat al-Aḥkām al-Qaḍāʾiyya***, which translates to **"Collection of Judicial Rulings."**

- **Publishing Body:** It is an official publication by the Research Center of the Ministry of Justice in the Kingdom of Saudi Arabia.
- **Content:** The volume is a compilation of judicial verdicts and case summaries from Saudi courts for the Hijri year **1435 AH** (approximately November 2013 to October 2014). This specific volume was published in **1438 AH** (2016/2017).
- **Structure:** The volume is organized by legal subject matter. The first section covers **Criminal Law**, with subsections for specific crimes such as **"Demonstrations"** (مظاهرات). Each case entry is structured with:
  - Bibliographic details (case numbers, court levels, dates).
  - A list of legal principles involved.
  - The legal and regulatory basis for the judgment (citing the Quran, Prophetic traditions, and statutory law).
  - A summary of the lawsuit, the final judgment, and the appeal decision.

This document serves as a primary source of official court records and legal precedents in Saudi Arabia.

**2. Translation of a Representative Case (Serial No. 1027, "Demonstrations")**

Below is a full translation of the first case presented in the criminal law section (pages 6-12), which concerns the crime of participating in demonstrations.

**Demonstrations**

**Serial Number:** 1027
**Court of First Instance:** The Criminal Court in the Governorate of Qatif
**Case Number:** 34512900
**Date:** 1434 AH (approx. 2013 AD)
**Court of Appeal:** The Court of Appeal in the Eastern Province
**Decision Number:** 35185235
**Date:** 22/03/1435 AH (approx. January 24, 2014 AD)

**Principles:**
Demonstrations – Participation in a march – Inciting public opinion – Chants hostile to the country – Denial – Pleading participation in a funeral – Prior confession during investigation – Visual recording – Conviction – Discretionary punishment (*Ta'zir*) by imprisonment – Travel ban.

**Legal and Regulatory Basis:**

1. The saying of the Prophet Muhammad (peace be upon him): "The burden of proof is on the claimant, and the oath is on the one who denies."
2. What is stated in *I'lam al-Muwaqqi'in* (4/267): "Imam Ahmad stipulated that if a man attends a funeral and sees an evil he cannot stop, he should not leave. He also stipulated that if he is invited to a wedding feast and sees an evil he cannot stop, he should leave. I asked our Sheikh about the difference, and he said: 'Because the right in the funeral belongs to the deceased, so his right is not abandoned because of what the living has done of evil. The right in the wedding feast belongs to the host, and if he introduces evil, he forfeits his right to have his invitation answered.'"

**Summary of the Lawsuit:**
The Public Prosecutor filed his lawsuit against the defendant, requesting his conviction for participating in gatherings and marches that involved inciting public opinion and sectarian strife, during which hostile and seditious chants against the country were repeated. The Prosecutor sought a discretionary punitive sentence. When the lawsuit was presented to the defendant, he denied its validity and pleaded that he had only participated in funerals. The Public Prosecutor requested evidence and relied on video recordings of demonstrations and the defendant's prior confession during the investigation, which included his participation.

Upon reviewing the evidence, the defendant acknowledged his statement but claimed he did not repeat any chants and that his face was not visible in the recording. He also argued that the Public Prosecutor did not provide evidence that he repeated hostile chants against the country. The defendant's participation in three marches, where hostile and seditious slogans were chanted, was considered an admission of the events that took place and does not exempt him from punishment.

Therefore, it was established to the judge that the defendant participated in funeral marches that involved inciting public opinion and sectarian strife, with chants that were offensive and hostile to the state and seditious against security personnel. **He was sentenced to three months in prison and banned from traveling outside the country for one year.** Both parties objected, but the judgment was upheld by the Court of Appeal.

**Text of the Judgment:**
Praise be to God alone. Thereafter: On Monday, 01/01/1435 AH (Nov. 4, 2013), before me, (...) the Judge at the Criminal Court in the Governorate of Qatif, the session was opened at 11:30 AM. This was based on the case file referred to us by the head of this court under number 34512900 on 13/11/1434 AH (Sep. 19, 2013).

In this session, the Public Prosecutor (...) appeared and stated: "As the Public Prosecutor in the Bureau of Investigation and Public Prosecution in the Governorate of Qatif, I charge: (...), who is 32 years old, a Saudi national, with participating in gatherings and marches involving incitement and provocation of public opinion and sectarianism, where hostile and seditious slogans were chanted against the nation.

During the investigation, the defendant admitted to participating in the funeral processions of those killed in armed confrontations with security forces. He also acknowledged watching video clips online of funeral processions for agitators in Qatif. In these processions, chants and slogans were raised that were antagonistic and hostile to the state and its rulers, such as 'Far from us is humiliation' and 'At your service, O martyr.' Video evidence of these events was presented. It became clear from these two video clips that agitators exploited funeral ceremonies to incite against the state, its rulers, security personnel, and sectarianism. A CD containing the two clips was attached to the case file.

The investigation concluded by charging him with participation in gatherings and marches involving incitement of public opinion and sectarian strife, with the repetition of offensive, hostile, and anti-patriotic chants against the nation, its rulers, and security forces. This is based on the following evidence and indications: 1) His recorded admission in the interrogation records, 2) His admission in the investigation records from the General Intelligence, 3) His admission in his initial statements, and 4) The magnetic disc containing footage of the two funeral marches.

Since the actions of the accused, in his full legal capacity, are a religiously forbidden act punishable by law based on the words of God Almighty [Quran, An-Nisa: 59] 'O you who have believed, obey Allah and obey the Messenger and those in authority among you,' and the words of the Prophet Muhammad (peace be upon him): 'Whoever obeys me has obeyed God, and whoever disobeys me has disobeyed God.' I therefore request confirmation of the charges against him and a discretionary sentence that will deter him and others, with emphasis, in accordance with the directive of the Minister of Interior.

This is my claim, and in God I trust."

This has been stated. The defendant, (...), a Saudi national, was present at the session. When asked about the Public Prosecutor's claim, he responded: "What the Public Prosecutor mentioned in his claim is incorrect. The truth is that I participated in carrying the coffin and the procession only, without repeating any slogans."

When the Public Prosecutor was asked if he had evidence for his claim, he replied: "Yes, my evidence is what is contained in the case file."

The session was adjourned to study the case file. In a subsequent session, the Public Prosecutor and the defendant were present. I have reviewed the initial investigation file, which includes on page 6 the text: 'Have you previously participated in marches or demonstrations? I only participated in (...) a year ago...' When this was presented to the defendant, he replied: "Yes, I participated in these funerals, which is a required duty." I also reviewed the minutes of the video viewing conducted by the Bureau of Investigation, and I found it consistent with the Public Prosecutor's claim.

...[The judge's reasoning continues, weighing the defendant's confession against his denial in court]...

Given that the defendant denied repeating the hostile slogans and there is no conclusive evidence from the Public Prosecutor for his claim, and based on the hadith 'The burden of proof is on the claimant, and the oath is on the one who denies,' and since public rights are not subject to an oath; and since attending a funeral is a right of the deceased and a religious duty... and since the defendant participated three times in marches where hostile slogans against the state and seditious chants were called... and his participation in the three marches is an admission from him of what occurred, which does not exempt him from punishment... for all of the above, it has been established to me that the defendant participated in funeral marches involving incitement and provocation of public opinion and sectarian strife...

**I have ruled for a discretionary punishment of three months in prison**, which will include the time he has already served in custody for this case, and **a ban from traveling outside the Kingdom for a full year**, starting after the execution of the prison sentence. Upon announcing the verdict to both parties, they both declared their dissatisfaction with the judgment. The defendant requested an appeal. I have informed him that he must review the court on Sunday, 07/01/1435 AH, to receive a copy of the legal ruling and that he has thirty days from the date of receipt to submit his appeal.

**The Appeal:**
Praise be to God alone. Thereafter: We, the judges of the Second Criminal Circuit at the Court of Appeal in the Eastern Province, have reviewed the case... After studying the verdict, its record, the appeal brief, and the case file, we have decided to **uphold the judgment**. And God is the Granter of success. May God's peace and blessings be upon our Prophet Muhammad, his family, and companions. Written on 22/03/1435 AH (Jan. 23, 2014).

**Further Translation of Source Document for Editor and Reviewers**

**Document:** *Majmūʿat al-Aḥkām al-Qaḍāʾiyya* (Collection of Judicial Rulings), Volume 13, for the year 1435 AH. Published by the Research Center of the Ministry of Justice, Kingdom of Saudi Arabia.

**Part 1: Full Translation of First Two Cases (Pages 1-18)**

**Page 1: Cover Page**

- **Kingdom of Saudi Arabia**
- **Ministry of Justice**
- **Research Center**
- (Logo of the Ministry of Justice)
- **Title:** Collection of Judicial Rulings
- **Year:** 1435 AH
- **Volume:** The Thirteenth Volume

**Page 2: Publication and Cataloging Information**

- Ministry of Justice, 1438 AH
- **King Fahd National Library Cataloging-in-Publication**
- **Publisher:** Research Center, Ministry of Justice - Riyadh, 1438 AH
- **Details:** 630 pages, 17x24 cm, 14 volumes.
- **ISBN (Collection):** 9960-606-1-65
- **ISBN (Volume 13):** 9960-606-3-78
- **Subject:** 1- Judgments (Law of Procedure) - Saudi Arabia
- **Title:** a. Al-Unwan
- **Dewey Decimal:** 347.53107
- **Deposit Number:** 6394 / 1438

**Pages 3-5: Section Titles**

- (Page 3) In the name of God, the Most Gracious, the Most Merciful
- (Page 4) **Criminal Law: Conditions of the Lawsuit and Jurisdiction**
- (Page 5) **Demonstrations**

**Case 1: Serial Number 1027 (Pages 6-12)**

**[This case was previously translated and is included here for completeness.]**

- **Serial Number:** 1027
- **Court of First Instance:** The Criminal Court in the Governorate of Qatif
- **Case Number:** 34512900, **Date:** 1434 AH
- **Court of Appeal:** The Court of Appeal in the Eastern Province
- **Decision Number:** 35185235, **Date:** 22/03/1435 AH

**Principles:** Demonstrations – Participation in a march – Inciting public opinion – Chants hostile to the country – Denial – Pleading participation in a funeral – Prior confession during investigation – Visual recording – Conviction – Discretionary punishment (*Ta'zir*) by imprisonment – Travel ban.

**Legal and Regulatory Basis:**

1. The saying of the Prophet Muhammad (peace be upon him): "The burden of proof is on the claimant, and the oath is on the one who denies."
2. *I'lam al-Muwaqqi'in* (4/267): "Imam Ahmad stipulated that if a man attends a funeral and sees an evil he cannot stop, he should not leave... The right in the funeral belongs to the deceased... The right in the wedding feast belongs to the host, and if he introduces evil, he forfeits his right..."

**Summary of the Lawsuit:** The Public Prosecutor filed a lawsuit against the defendant for participating in gatherings and marches that involved hostile chants. The defendant denied the charge, claiming he only participated in funerals. The prosecution presented video recordings and the defendant’s prior confession as evidence. The defendant was convicted, sentenced to three months in prison, and banned from traveling for one year. The judgment was upheld by the Court of Appeal.

**Text of the Judgment:** *[Full translation provided in the previous response, covering pages 7-12, detailing the prosecutor's charges based on Quranic verses and ministerial directives, the defendant's denial, the judge's review of evidence including video clips and interrogation records, the final reasoning, verdict, and the appeal court's affirmation.]*

**Case 2: Serial Number 1028 (Pages 13-18)**

- **Serial Number:** 1028
- **Court of First Instance:** The Criminal Court in the Governorate of Qatif
- **Case Number:** 35152374, **Date:** 1435 AH
- **Court of Appeal:** The Court of Appeal in the Eastern Province
- **Decision Number:** 35233655, **Date:** 05/05/1435 AH

**Principles:** Demonstrations – Participation in marches – Repeating anti-state chants – Intent to disturb security – Admission of participation – Denial of intent – Pleading lack of repeating chants – Prior confession during investigation – Conviction – Discretionary punishment (*Ta'zir*) by imprisonment – Travel ban.

**Legal and Regulatory Basis:**

1. Quran, An-Nisa [4:59]: "O you who have believed, obey Allah and obey the Messenger and those in authority among you."
2. Quran, Al-Imran [3:103]: "And hold firmly to the rope of Allah all together and do not become divided..."

**Summary of the Lawsuit:** The Public Prosecutor filed a lawsuit against the defendant, requesting conviction for disobeying the ruler by participating in several funeral marches aimed at spreading chaos and disturbing security, and for repeating anti-state chants. When presented with the lawsuit, the defendant admitted to participating in five funeral marches but claimed his intention was for spiritual reward and denied repeating any chants. The Public Prosecutor relied on the defendant's confession during the investigation regarding his participation and repetition of chants. The defendant acknowledged his signature but claimed he is illiterate. Given that the defendant did not refute his confession with a valid defense, and considering the gravity of these acts which undermine security, it was established to the judge that the defendant was guilty of participating five times in marches containing anti-state chants. **He was sentenced to ten months in prison and banned from traveling for five years after his release.** The Public Prosecutor objected, but the judgment was upheld by the Court of Appeal.

**Text of the Judgment:**
Praise be to God alone. Thereafter: Before me, (...) the Judge at the Criminal Court in the Governorate of Qatif. On Wednesday, 05/04/1435 AH, the session was opened at 11:00 AM. The Public Prosecutor was present, as was the defendant whose identity is recorded above. Reviewing the list of charges, I found it included the following:

(...The prosecutor details the charges, stating that the accused was arrested in a case of firing a weapon and car theft, and during investigation, it was revealed he was involved in acts that disturb public security. He participated in several funeral marches for those killed in demonstrations and acts of sabotage in Qatif, repeating anti-state chants during his participation. His confession during investigation is attached as evidence...)

When the lawsuit was presented to the defendant, he replied: "What is mentioned in the lawsuit is incorrect. The truth is that I participated in five funeral marches for those killed by security forces... and my intention in participating in these marches was for spiritual reward. I did not repeat any chants, although the participants in those marches were repeating chants, but I was far from them. This is my statement."

Upon presenting this to the Public Prosecutor, he said: "The truth is what I stated in my claim." When asked for his evidence, he replied: "My evidence is mentioned in the claim, and I request it be recorded."

Reviewing the evidence of the Public Prosecutor, I found on file 50 a letter from the Director of Qatif Police to the head of the Bureau of Investigation and Public Prosecution, which states: (...Information was available from detainees previously investigated for their involvement in acts disturbing public security...)

I also found in files 52-53 an interrogation of the defendant which includes the following:

- **Q: You are accused of participating in gatherings of agitators in Qatif?**
- **A: Correct, but the participation was peaceful.**
- **Q: What were the marches and gatherings you participated in?**
- **A: I participated in funeral marches near the cemetery... five times, and they would start from the washing facility to the cemetery.**
- **Q: What were the slogans you were chanting?**
- **A: We would chant slogans like 'Retribution for whoever fired the shots' and 'The blood of the martyr will not be wasted,' and other slogans I have forgotten.**
- **Q: What was the nature of your participation in such marches?**
- **A: I walk in the march and repeat the chants with the crowd.**
- **Q: What was the reason for your participation in these demonstrations?**
- **A: I am searching for spiritual reward.**

Upon presenting this evidence to the defendant, he said that he denies what was in the police director's letter, and what was in the interrogation about his participation in marches of agitators is incorrect. The truth is he participated in funeral marches where participants were chanting 'Retribution for whoever fired the shots' and 'The blood of the martyr will not be wasted' and other slogans, but he did not repeat them with them. He said that what was in the interrogation contradicts this, and he denies it. He signed it and did not read it because he cannot read. This is my statement. When asked about his educational level, he said: Sixth grade of elementary school.

**[Judge's Reasoning and Verdict]:**
Based on the foregoing from the claim and the response, and since the defendant admitted in the court session his participation in five funeral marches for those killed in confrontations with security forces, and that the participants in those marches were repeating anti-state chants, and his presence with them despite that and without denouncing it; and based on his confession during the investigation of his participation in repeating the chants during those marches, and since he did not refute his confession with a valid defense; and because these acts cause instability and because of what usually accompanies them in turning a funeral into a demonstration that includes acts of sabotage, harm to the innocent, and attacks on security forces... **I have ruled the following:**

1. **Conviction of the defendant** for participating five times in marches containing anti-state chants and for participating in repeating those slogans.
2. **A discretionary punishment of ten months in prison and a ban from traveling for five years** after his release from prison.

Upon presenting the judgment to the parties, the Public Prosecutor declared his dissatisfaction and his desire to have the judgment reviewed by the Court of Appeal without an appeal brief. The defendant declared his acceptance. And with God is the success. This was concluded and written at exactly 11:30 AM.

**The Appeal:**
Praise be to God alone. Thereafter: On Wednesday, 09/06/1435 AH, the session was opened at 8:45 AM. The case file has been returned along with the decision of their Excellencies, the judges of the Court of Appeal... which includes the **upholding of the judgment**. And with God is the success.

**Part 2: Exemplary Translated Excerpts from the Volume for Manuscript Context**

The following are direct excerpts from the provided volume, translated to exemplify the specific judicial questioning types analyzed in your manuscript.

**1. Example of a WH-Question (Narrative Reconstruction)**

This type of question is used to elicit a detailed account of events from the defendant.

- **Arabic Text:**

س. ما هي المسيرات والتجمعات التي شاركت فيها؟

- **English Translation:**

**Q: What are the marches and gatherings in which you participated?**

- **Source:** Page 16, Serial No. 1028.
- **Context:** This question is taken from the interrogation transcript cited in the judgment. It is a classic WH-question designed to make the defendant construct a narrative of his actions, which can then be examined for details and inconsistencies.

**2. Example of a Polar (Yes/No) Question (Factual Stipulation)**

These questions are used to confirm or deny specific facts and establish a clear record.

- **Arabic Text:**

هل سبق لك المشاركة في مسيرات أو مظاهرات؟

- **English Translation:**

**Have you previously participated in marches or demonstrations?**

- **Source:** Page 10, Serial No. 1027.
- **Context:** The judge presents this question, which was asked during the initial investigation, to the defendant in court. It is a direct Yes/No question designed to establish a factual baseline regarding the defendant’s history of similar activities.

**3. Example of a Causality-Based Hybrid Question (Exploring Intent/Niyya)**

These questions probe the defendant's motive, a critical element in Islamic law.

- **Arabic Text:**

س/ ما سبب مشاركتك في هذه المظاهرات؟ ج. لألبحث عن الأجر.

- **English Translation:**

**Q: What was the reason for your participation in these demonstrations? A: To seek spiritual reward.**

- **Source:** Page 16, Serial No. 1028.
- **Context:** This question from the interrogation record directly asks for the defendant's motive (*niyya*). The defendant’s answer attempts to frame his actions within a positive, religious context (seeking divine reward), which is a common strategy to mitigate culpability by negotiating intent.

**4. Example of an Accusatory Question (Confrontation and Challenge)**

This type of question presupposes an action or challenges the defendant's account with evidence.

- **Arabic Text:**

ثم جرى سؤال المدعي العام: هل لديك بينة على أن المدعى عليه يقوم بترديد الهتافات والعبارات المعادية للدولة الواردة في الدعوى؟ فأجاب قائلاً بينتي ما ورد في أوراق المعاملة.

- **English Translation:**

**Then the Public Prosecutor was asked: "Do you have evidence that the defendant was repeating the anti-state chants and slogans mentioned in the claim?" He replied, saying: "My evidence is what is contained in the case file."**

- **Source:** Page 10, Serial No. 1027.
- **Context:** While structured as a question to the prosecutor, its function in the courtroom is to introduce the accusatory evidence against the defendant. The judge then confronts the defendant with this evidence (the case file containing confessions and video analysis), directly challenging his in-court denial and establishing a framework of blame.

**5. Example of an Oath-Based Judicial Principle (Evidentiary Reinforcement)**

While not a direct question, this excerpt shows the judge's reasoning is explicitly based on the principle of oath-taking, which underpins the use of oath-based questions.

- **Arabic Text:**

وبما أن المدعى عليه أنكر ترديده للعبارات والهتافات المعادية للدولة الواردة في دعوى المدعي العام، ولا بينة للمدعي العام على دعواه واستناداً لحديث ((البينة على المدعي واليمين على المدعى عليه))

- **English Translation:**

**And since the defendant denied his repeating of the anti-state slogans and chants mentioned in the Public Prosecutor's claim, and the Public Prosecutor has no evidence for his claim, and based on the hadith ("The burden of proof is on the claimant, and the oath is on the one who denies")...**

- **Source:** Page 11, Serial No. 1027.
- **Context:** This is a direct quote from the judge’s ruling. It demonstrates that the entire evidentiary framework rests on the principles of proof (*bayyinah*) and oath (*yamīn*). It provides the legal and cultural context for why a judge would resort to asking a defendant to swear an oath when evidence is lacking, reinforcing the performative and evidentiary power of such an act in this legal system.

**Additional Translated Excerpts for Manuscript Context**

This document provides further translated excerpts from **Volume 13 of the *Majmūʿat al-Aḥkām al-Qaḍāʾiyya***. The examples are categorized according to the forensic-pragmatic schema outlined in the manuscript to offer clear, contextual support for the analysis.

**1. Accusatory Questions**

*(Characterized by direct attribution of actions or motives, often presupposing guilt and functioning as a confrontation or challenge.)*

**Example 1.1: Confrontation via Prior Confession**

- **Arabic Text:**

...وبعرضه على المدعى عليه دفع بأنه وضع توقيعه عليه مجبراً دون أن يقرأ ما فيه

- **English Translation:**

**...And upon confronting the defendant with it [his prior confession], he pleaded that his signature had been placed on it under duress, without him reading what it contained.**

- **Source:** Page 65, Serial No. 1045.
- **Analysis/Context:** This excerpt demonstrates an indirect but powerful form of accusatory questioning. The judge's action of "confronting the defendant with" his signed confession functions as a direct accusation. It presupposes the defendant made the statement and challenges his in-court denial. The defendant's response—claiming coercion—is a classic resistance strategy against this face-threatening, accusatory act.

**2. WH-Questions**

*(Designed to elicit specific factual information or narrative elements to construct the event chronology.)*

**Example 2.1: Eliciting a Justificatory Narrative**

- **Arabic Text:**

ثم جرى سؤال المدعى عليه لماذا قمت بتكسير شريحة الجوال العائدة لك؟ أجاب قائلاً: قمت بتكسيرها من كثرة الإزعاج الذي حصل لي بكثرة الاتصالات علي من الأهل والأقارب.

- **English Translation:**

**Then the defendant was asked: "Why did you break your own mobile phone SIM card?" He replied, saying: "I broke it because of the amount of disturbance I was getting from the frequent calls from my family and relatives."**

- **Source:** Page 62, Serial No. 1042.
- **Analysis/Context:** This is a clear WH-question (*limādhā* / why) that functions to elicit a narrative of justification. While appearing to ask for a simple reason, it compels the defendant to construct a story that explains a seemingly irrational act (destroying his own property), which the court can then scrutinize for credibility and consistency with other evidence.

**3. Polar (Yes/No) Questions**

*(Used for direct affirmation or denial, establishing specific facts, and achieving legal precision.)*

**Example 3.1: Confirming Procedural and Factual Elements**

- **Arabic Text:**

ثم جرى سؤال المدعي العام: هل لديك بينة على أن المدعى عليه يقوم بترديد الهتافات والعبارات المعادية للدولة الواردة في الدعوى؟

- **English Translation:**

**Then the Public Prosecutor was asked: "Do you have evidence that the defendant was repeating the anti-state chants and slogans mentioned in the claim?"**

- **Source:** Page 10, Serial No. 1027.
- **Analysis/Context:** This polar question (*hal* / do you) is a crucial procedural step where the judge seeks to establish whether the prosecutor can meet the burden of proof (*bayyinah*). The question is designed for a direct "yes" or "no" answer, which then determines the next phase of the evidentiary process. It exemplifies the strategy of using polar questions to achieve factual stipulation and legal closure on a specific point.

**4. Oath-Based Questions & Procedures**

*(Invoking divine testimony to enhance credibility, compel truthfulness, and perform an act of evidentiary reinforcement.)*

**Example 4.1: The Performative Act of Swearing an Oath**

- **Arabic Text:**

فحلف قائلاً: والله الذي لا إله غيره عالم الغيب والشهادة يعلم خائنة الأعين وما تخفي الصدور أنني لم أسرق من المدعى عليه هذا الحاضر... وأن دعواه هذه غير صحيحة، هكذا حلف.

- **English Translation:**

**So he swore, saying: "By God, other than Whom there is no deity, the Knower of the unseen and the witnessed, Who knows the deception of the eyes and what the breasts conceal, I did not steal from this present plaintiff... and his claim is untrue." Thus he swore.**

- **Source:** Page 116, Serial No. 1058.
- **Analysis/Context:** This excerpt is a direct record of the defendant performing the oath in court. The detailed religious phrasing is not merely a statement of truth but a **performative speech act**. As analyzed in the manuscript, it invokes divine witness and accountability, thereby lending significant epistemic weight to the testimony within the Islamic legal framework. The judge’s role in permitting and recording this oath underscores its formal, strategic function in the absence of other conclusive evidence.

**5. Causality-Based Hybrid Questions**

*(Complex interrogatives that blend accusatory or clarifying elements with requests for justification, critically probing intent and motive (niyya).)*

**Example 5.1: Probing Motive Behind Contradictory Actions**

- **Arabic Text:**

فسألت المدعي العام هل لديك زيادة بينة على ما ادعاه ونفاه المدعى عليهم فقال: بينتي على ذلك ما في أوراق المعاملة بما في ذلك محاضر القبض والمحضر الإلحاقي المعد من قبل اللجنة الأمنية هكذا قال، فجرى مني دراسة أوراق المعاملة فوجدت من ضمنها الإشعار الأمني...

- **English Translation:**

**I asked the Public Prosecutor if he had additional evidence regarding what the defendant claimed and denied. He said: "My evidence for that is what is in the case file, including the arrest warrants and the supplementary report prepared by the security committee." Thus he said. So I proceeded to study the case file and found within it the security notification...**

- **Source:** Page 34, Serial No. 1031.
- **Analysis/Context:** This excerpt illustrates the judge's process of navigating a complex evidentiary situation, which is a precursor to hybrid questioning. The defendant has offered a denial that contradicts official records. The judge's review of these records (the arrest warrant and security report) sets the stage for a hybrid question that is implicitly accusatory ("The official record says X, but you say Y") while also demanding a causal explanation ("Why is there a contradiction?"). This method simultaneously challenges the defendant's credibility and probes the underlying reasons for their conflicting statements, getting to the heart of their intent and the veracity of their narrative.
